# Supplementary material for: Neanderthal and Denisova tooth protein variants in present-day humans
Source: PubMed Central journal article supplement (PMC5597096; doi:10.1371/journal.pone.0183802), 2017-09-13
Supplement: pone.0183802.s001.pdf [file pone.0183802.s001.pdf]

| AMBN (over 209 missenses)          | Allele frequency of the variant |        |       |       |       |       |
|------------------------------------|---------------------------------|--------|-------|-------|-------|-------|
|                                    | All                             | AFR    | AMR   | EUR   | EAS   | SAS   |
| S41N (rs546778141) derived         | 0.16                            | 0.07   | 0.19  | 0.24  | 0.3   | 0.01  |
| M76V (rs200620822) derived         |                                 |        |       |       | 0.001 |       |
| M76I (rs145190129) derived         | 0.002                           | 0.01   |       |       |       |       |
| G78V (rs145763811) derived         | 0.005                           | 0.016  | 0.006 |       |       |       |
| <b>G78S (rs143795139) derived</b>  |                                 | 0.0001 |       |       |       |       |
| S102Y (rs145745749) derived        | 0.006                           | 0.02   | 0.006 |       |       |       |
| P125H (rs180819235) derived        |                                 |        | 0.001 |       |       |       |
| E142K (rs550317645) derived        |                                 |        |       |       |       | 0.001 |
| V181A (rs189846864) derived        | 0.001                           |        | 0.004 |       |       |       |
| D182Y (rs543637559) derived        |                                 |        |       | 0.001 |       |       |
| R222H (rs142755020) derived        |                                 |        |       |       | 0.001 |       |
| P230S (rs369135444) derived        | 0.001                           |        |       |       |       | 0.003 |
| V244M (rs201976575) derived        | 0.01                            |        |       |       |       | 0.05  |
| A255V (rs7439186) derived          | 0.12                            | 0.15   | 0.073 | 0.065 | 0.15  | 0.14  |
| G268R (rs146167261) derived        | 0.002                           |        |       | 0.002 |       | 0.006 |
| <b>M273V (rs564905233) derived</b> | 0.001                           |        |       |       |       | 0.003 |
| G276R (rs201299436) derived        |                                 |        |       |       | 0.001 |       |
| M285I (rs115723025) derived        | 0.034                           | 0.12   | 0.01  |       |       |       |
| G288S (rs568675718) derived        | 0.001                           |        |       |       |       | 0.004 |
| P293S (rs200796492) derived        |                                 |        | 0.001 |       |       |       |
| H294Q (rs113506649) derived        | 0.02                            | 0.065  | 0.01  |       |       |       |
| G300S (rs139319140) derived        | 0.002                           | 0.007  |       |       | 0.001 |       |
| E317A (rs150017698) derived        | 0.003                           | 0.01   | 0.001 |       |       |       |
| M328T (rs538513467) derived        |                                 |        | 0.001 |       |       |       |
| P329L (rs140331879) derived        | 0.004                           |        | 0.003 |       | 0.02  | 0.001 |
| A351T (rs141401324) derived        |                                 | 0.001  |       |       |       |       |
| L354P (rs72654387) derived         | 0.02                            |        | 0.024 | 0.06  |       | 0.01  |
| G363S (rs543838539) derived        |                                 |        |       |       | 0.001 |       |
| V378I (rs76503327) derived         | 0.024                           | 0.09   | 0.006 |       |       |       |
| L391S (rs141535122) derived        |                                 |        |       | 0.002 |       |       |
| T416A (rs527740107) derived        |                                 | 0.001  |       |       |       |       |
| T417M (rs146171297) derived        |                                 |        |       |       |       | 0.001 |
| E436K (rs149937358) derived        | 0.001                           |        |       | 0.002 | 0.003 | 0.001 |
| A441T (rs144829376) derived        | 0.001                           | 0.002  |       | 0.001 |       |       |
| AMTN (88 missenses)                | Allele frequency of the variant |        |       |       |       |       |
| All                                | AFR                             | AMR    | EUR   | EAS   | SAS   |       |
| R15W (rs35286445) derived          | 0.11                            | 0.007  | 0.11  | 0.16  | 0.19  | 0.14  |
| P18S (rs35426053) derived          | 0.006                           | 0.02   | 0.001 |       |       |       |
| P33L (rs199658784) derived         |                                 |        |       |       |       | 0.001 |
| N45S (rs7660807) derived           | 0.1                             | 0.006  | 0.06  | 0.1   | 0.2   | 0.17  |
| V47F (rs192563032) derived         | 0.001                           | 0.007  |       |       |       |       |
| S50P (rs34803339) derived          | 0.03                            | 0.07   | 0.01  |       | 0.001 | 0.04  |
| G78S (rs151041998) derived         | 0.001                           |        |       | 0.004 |       | 0.001 |
| G88E (rs146006787) derived         | 0.001                           |        | 0.003 | 0.004 |       |       |
| L89M (rs560519245) derived         |                                 |        |       |       |       | 0.001 |
| A109T (rs201205218) derived        | 0.001                           |        | 0.001 | 0.001 |       | 0.003 |
| H129Y (rs148416277) derived        |                                 | 0.002  |       |       |       |       |
| G166E (rs565052404) derived        |                                 | 0.001  |       |       |       |       |
| R171C (rs201349837) derived        | 0.001                           | 0.002  |       |       | 0.001 |       |
| <b>R171H (rs117133443) derived</b> |                                 |        |       |       |       |       |
| G177V (rs61755875) derived         | 0.02                            | 0.06   | 0.004 | 0.01  | 0.005 |       |
| D181N (rs185210496) derived        |                                 |        |       |       | 0.001 |       |
| <b>A200V (rs376682442) derived</b> | 0.004                           |        |       |       |       | 0.02  |
| CEMP1 (over 143 missenses)         | Allele frequency of the variant |        |       |       |       |       |
| All                                | AFR                             | AMR    | EUR   | EAS   | SAS   |       |
| A11G (rs547680075) derived         |                                 |        |       |       |       | 0.001 |
| <b>R15Q (rs370735504) derived</b>  |                                 |        | 0.001 |       | 0.001 |       |
| S19F (rs201463378) derived         |                                 |        | 0.001 |       |       |       |
| T27I (rs563820819) derived         |                                 | 0.001  |       |       |       |       |

|                                    |                                        |            |            |            |            |            |
|------------------------------------|----------------------------------------|------------|------------|------------|------------|------------|
| C28R (rs200449794) derived         |                                        |            |            |            | 0.001      |            |
| G50V (rs574778073) derived         |                                        |            |            |            | 0.001      |            |
| <b>K55E (rs13331643) ancestral</b> | 0.07                                   | 0.26       | 0.02       | 0.002      |            | 0.001      |
| <b>R80H (rs79379654) derived</b>   | 0.001                                  | 0.005      |            |            |            |            |
| R81H (rs200977329) derived         |                                        |            | 0.003      |            |            |            |
| A103S (rs535834483) derived        | 0.002                                  |            |            |            |            | 0.008      |
| A107G (rs76722821) derived         | 0.008                                  |            | 0.02       | 0.03       |            | 0.002      |
| R113K (rs202046694) derived        |                                        |            | 0.001      |            |            |            |
| S120P (rs200124887) derived        |                                        | 0.001      |            |            |            |            |
| P164L (rs531558523) derived        |                                        |            |            |            |            | 0.001      |
| V165I (rs563584391) derived        |                                        |            |            |            |            | 0.001      |
| P173Q (rs543906255) derived        |                                        | 0.001      |            |            |            |            |
| V182L (rs189095388) derived        |                                        |            |            | 0.002      |            |            |
| P214L (rs185302486) derived        |                                        |            |            |            | 0.001      |            |
| R216Q (rs141294706) derived        |                                        | 0.002      |            |            |            |            |
| T223M (rs558847727) derived        |                                        |            |            |            |            | 0.001      |
| R225C (rs181209921) ancestral      |                                        |            |            |            | 0.001      |            |
| R225H (rs576590180) derived        |                                        |            | 0.001      |            |            |            |
| G234S (rs536394645) derived        |                                        |            | 0.001      |            |            |            |
| T238K (rs61746888) derived         |                                        | 0.001      |            | 0.001      |            |            |
| <b>DMP1 (over 216 missenses)</b>   | <b>Allele frequency of the variant</b> |            |            |            |            |            |
|                                    | <b>All</b>                             | <b>AFR</b> | <b>AMR</b> | <b>EUR</b> | <b>EAS</b> | <b>SAS</b> |
| R21K (rs552859119) derived         |                                        |            |            | 0.001      |            |            |
| S27P (rs150105108) derived         |                                        |            |            |            | 0.001      |            |
| T42P (rs369550864) derived         | 0.001                                  |            |            |            | 0.004      |            |
| E49G (rs200704471) derived         |                                        | 0.001      |            |            |            |            |
| E60D (rs546062219) derived         |                                        |            |            |            |            | 0.001      |
| S69C (rs10019009) derived          | 0.29                                   | 0.26       | 0.33       | 0.23       | 0.43       | 0.21       |
| D80N (rs567911405) derived         |                                        |            | 0.001      |            |            |            |
| A88V (rs144773084) derived         |                                        | 0.001      |            |            |            |            |
| F91L (rs556512826) derived         |                                        |            |            |            |            | 0.001      |
| T113I (rs145164698) derived        |                                        | 0.002      |            |            |            |            |
| D141N (rs144580319) derived        | 0.001                                  | 0.002      |            |            |            |            |
| D142Y (rs201761802) derived        | 0.002                                  |            |            |            | 0.008      |            |
| Q159K (rs79402270) derived         | 0.016                                  |            | 0.04       | 0.003      | 0.05       | 0.002      |
| <b>R173Q (rs747698893) derived</b> |                                        |            |            |            | 0.0001     | 0.001      |
| T184I (rs149938637) derived        |                                        |            |            | 0.001      |            |            |
| G207D (rs200520896) derived        |                                        |            |            | 0.001      |            |            |
| S225N (rs373051924) derived        |                                        |            | 0.001      |            |            |            |
| M237V (rs201413886) derived        |                                        |            |            |            | 0.001      |            |
| S242P (rs147552663) derived        |                                        | 0.002      |            |            |            |            |
| S246R (rs190314299) derived        |                                        |            | 0.001      |            |            |            |
| P263A (rs571820459) derived        |                                        |            |            | 0.001      |            |            |
| R272H (rs145237146) derived        | 0.001                                  |            | 0.004      | 0.003      |            |            |
| L282I (rs141979823) derived        | 0.003                                  |            | 0.004      |            | 0.01       |            |
| M288T (rs565811736) derived        |                                        | 0.001      |            |            |            |            |
| E329D (rs554234835) derived        |                                        |            |            | 0.001      |            |            |
| V333I (rs147275271) derived        | 0.002                                  | 0.005      |            |            |            | 0.001      |
| E362Q (rs558823933) derived        |                                        |            |            | 0.001      |            |            |
| E362A (rs576618731) derived        |                                        |            |            | 0.001      |            |            |
| D369N (rs540873212) derived        |                                        |            |            |            | 0.001      |            |
| S384N (rs148498977) derived        |                                        | 0.001      |            |            |            |            |
| S389L (rs572239643) derived        |                                        | 0.001      |            |            |            |            |
| E402K (rs185655763) derived        |                                        |            |            | 0.001      |            |            |
| P419S (rs140275311) derived        |                                        |            |            | 0.001      |            |            |
| P419R (rs145278609) derived        |                                        | 0.001      |            |            |            |            |
| S427T (rs532733390) derived        |                                        |            |            |            | 0.001      |            |
| K463R (rs34661425) derived         | 0.02                                   | 0.06       | 0.01       | 0.002      |            |            |
| T469M (rs199734764) derived        |                                        |            |            |            | 0.001      |            |
| D478A (rs148156611) derived        | 0.001                                  |            | 0.003      | 0.001      |            |            |
| <b>N483T (rs574215585) derived</b> | 0.004                                  | 0.001      |            |            |            | 0.02       |
| N498S (rs373096835) derived        | 0.001                                  | 0.002      |            |            |            |            |

| I501T (rs146762807) derived        | 0.001                           | 0.002 |       |          |        | 0.001  |
|------------------------------------|---------------------------------|-------|-------|----------|--------|--------|
| ENAM (over 494 missenses)          | Allele frequency of the variant |       |       |          |        |        |
|                                    | All                             | AFR   | AMR   | EUR      | EAS    | SAS    |
| I26F (rs141034810) derived         | 0.001                           |       |       |          | 0.005  |        |
| M40V (rs533270579) derived         |                                 | 0.001 |       |          |        |        |
| Q88R (rs565258194) derived         |                                 |       | 0.001 |          |        |        |
| K111T (rs532584416) derived        |                                 |       |       |          |        | 0.001  |
| K115N (rs544910871) derived        |                                 |       |       |          |        | 0.001  |
| P125A (rs563240539) derived        |                                 |       |       |          |        | 0.002  |
| P147L (rs201940627) derived        |                                 |       | 0.001 |          |        |        |
| P155L (rs374823061) derived        |                                 | 0.001 |       |          |        |        |
| Q171K (rs192104094) derived        |                                 |       |       |          | 0.002  |        |
| Q171R (rs556419641) derived        |                                 |       |       | 0.001    |        |        |
| Q178E (rs574769451) derived        |                                 | 0.001 |       |          |        |        |
| L180S (rs367993395) derived        |                                 | 0.002 |       |          |        |        |
| R187C (rs200947570) derived        |                                 |       | 0.001 |          |        |        |
| G195A (rs143129444) derived        |                                 | 0.001 |       |          |        | 0.001  |
| G201V (rs574810587) derived        |                                 |       |       |          |        | 0.001  |
| G239V (rs541993951) derived        |                                 |       |       |          | 0.002  |        |
| T251M (rs188769287) derived        |                                 |       |       |          | 0.001  | 0.001  |
| R317C (rs564877872) derived        |                                 |       |       |          |        | 0.001  |
| R332G (rs201174697) derived        |                                 | 0.001 |       |          |        |        |
| G358S (rs147295492) derived        | 0.001                           |       |       |          | 0.003  |        |
| R368C (rs529994198) derived        |                                 |       |       |          | 0.001  |        |
| R373P (rs143134915) derived        |                                 |       |       |          |        | 0.001  |
| P374L (rs566662520) derived        |                                 |       |       | 0.001    |        |        |
| A382V (rs144413018) derived        |                                 |       |       |          | 0.001  |        |
| <b>G389S (rs74511578) derived</b>  | 0.013                           | 0.05  | 0.003 |          |        |        |
| Y394H (rs570864098) derived        |                                 |       |       |          | 0.002  |        |
| Y394F (rs142747446) derived        | 0.001                           |       |       | 0.002    |        | 0.002  |
| <b>T415I (rs779308123) derived</b> |                                 |       |       | < 0.0001 |        |        |
| <b>R429H (rs375758699) derived</b> | 0.0005                          |       |       |          |        |        |
| G442S (rs189446150) derived        |                                 |       | 0.003 |          |        |        |
| P450S (rs180899807) derived        |                                 |       |       |          | 0.002  |        |
| V466I (rs148712673) derived        | 0.002                           | 0.001 |       | 0.007    |        |        |
| G478V (rs554084117) derived        |                                 |       |       |          |        | 0.001  |
| V488L (rs572302644) derived        |                                 | 0.001 |       |          |        |        |
| S494Y (rs143617256) derived        |                                 |       |       | 0.001    |        |        |
| K518N (rs146719067) derived        |                                 |       |       | 0.001    |        |        |
| T533S (rs576885761) derived        |                                 |       |       |          | 0.002  |        |
| S542T (rs200201281) derived        |                                 |       |       | 0.002    |        |        |
| I552M (rs145361338) derived        |                                 |       |       |          |        | 0.001  |
| P555L (rs201913549) derived        |                                 |       |       |          | 0.001  |        |
| F576L (rs2609428) derived          | 0.04                            | 0.13  | 0.014 | 0.01     |        |        |
| P588S (rs149033201) derived        |                                 | 0.002 |       |          |        |        |
| G596R (rs201141678) derived        |                                 |       |       |          |        | 0.001  |
| K633N (rs552101482) derived        |                                 |       | 0.001 |          |        |        |
| <b>T648I (rs7671281) derived</b>   | 0.82                            | 0.47  | 0.89  | 0.95     | 0.98   | 0.94   |
| V649L (rs199541879) derived        |                                 |       |       | 0.001    |        |        |
| E674K (rs139631708) derived        |                                 |       |       |          | 0.001  |        |
| H685R (rs535506506) derived        |                                 |       | 0.001 |          |        |        |
| S693L (rs147484294) derived        |                                 |       | 0.001 |          |        |        |
| P701S (rs539990971) derived        |                                 |       | 0.001 |          |        |        |
| P724L (rs3796703) derived          | 0.013                           | 0.002 | 0.004 | 0.013    | 0.04   | 0.006  |
| Y731C (rs181187768) derived        | 0.001                           |       |       |          |        |        |
| R763Q (rs3796704) derived          | 0.14                            | 0.37  | 0.1   | 0.05     | 0.02   | 0.05   |
| Q775R (rs572270911) derived        |                                 |       |       |          |        | 0.001  |
| R843S (rs74981230) derived         | 0.002                           |       |       |          | 0.01   |        |
| D905G (rs199816355) derived        |                                 |       |       | 0.001    |        |        |
| T916A (rs552776312) derived        |                                 |       |       |          |        | 0.002  |
| R946T (rs79087969) derived         | 0.007                           | 0.03  | 0.001 |          |        |        |
| <b>T951M (rs561402393) derived</b> |                                 |       |       |          | 0.0001 | 0.0001 |

|                                  |                                        |            |            |            |            |            |
|----------------------------------|----------------------------------------|------------|------------|------------|------------|------------|
| R954K (rs552090369) derived      |                                        |            |            | 0.001      |            |            |
| N1008S (rs200932780) derived     |                                        |            |            | 0.001      |            |            |
| G1022V (rs556253149) derived     |                                        |            |            |            |            | 0.001      |
| R1048I (rs535411629) derived     |                                        |            | 0.001      |            |            |            |
| D1076N (rs140345705) derived     |                                        | 0.001      |            |            |            |            |
| T1095S (rs576112196) derived     |                                        | 0.001      |            |            |            |            |
| Q1104Stop (rs114751362) derived  |                                        | 0.001      |            |            |            |            |
| S1107N (rs71599965) derived      | 0.003                                  | 0.002      | 0.003      | 0.01       |            | 0.001      |
| I1108V (rs529369991) derived     |                                        |            |            |            |            | 0.001      |
| F1121I (rs541159378) derived     |                                        | 0.001      |            |            |            |            |
| V1134L (rs200396980) derived     | 0.002                                  |            |            |            |            | 0.01       |
| D1136H (rs142122738) derived     | 0.001                                  | 0.002      | 0.001      |            |            |            |
| <b>MGP (over 55 missenses)</b>   | <b>Allele frequency of the variant</b> |            |            |            |            |            |
|                                  | <b>All</b>                             | <b>AFR</b> | <b>AMR</b> | <b>EUR</b> | <b>EAS</b> | <b>SAS</b> |
| <b>A8V (rs142330429) derived</b> | 0.02                                   |            |            | 0.004      | 0.031      | 0.043      |
| A12T (rs184536928) derived       |                                        |            | 0.001      |            |            |            |
| G30S (rs531889747) derived       |                                        |            |            |            |            | 0.001      |
| H48N (rs550400563) derived       |                                        |            |            |            | 0.001      |            |
| N64H (rs145210821) ancestral     | 0.002                                  | 0.001      | 0.01       | 0.001      |            |            |
| A77S (rs536781673) derived       |                                        | 0.002      |            |            |            |            |
| K78E (rs1801716) derived         | 0.004                                  |            | 0.004      | 0.003      |            | 0.014      |
| R84Q (rs536440407) derived       |                                        |            |            |            |            | 0.001      |
| E92K (rs550754490) derived       |                                        |            |            | 0.001      |            |            |
| N94H (rs539042522) derived       |                                        | 0.001      |            |            |            |            |
| R119H (rs546998085) derived      |                                        | 0.001      |            |            |            |            |
| R125Q (rs145254250) derived      | 0.001                                  | 0.004      |            |            |            |            |
| <b>T127A (rs4236) ancestral</b>  | 0.39                                   | 0.55       | 0.4        | 0.38       | 0.13       | 0.43       |
