# Supplementary material for: Neanderthal and Denisova tooth protein variants in present-day humans
Source: PubMed Central journal article supplement (PMC5597096; doi:10.1371/journal.pone.0183802), 2017-09-13

### Frequency of archaic missense variants in living humans

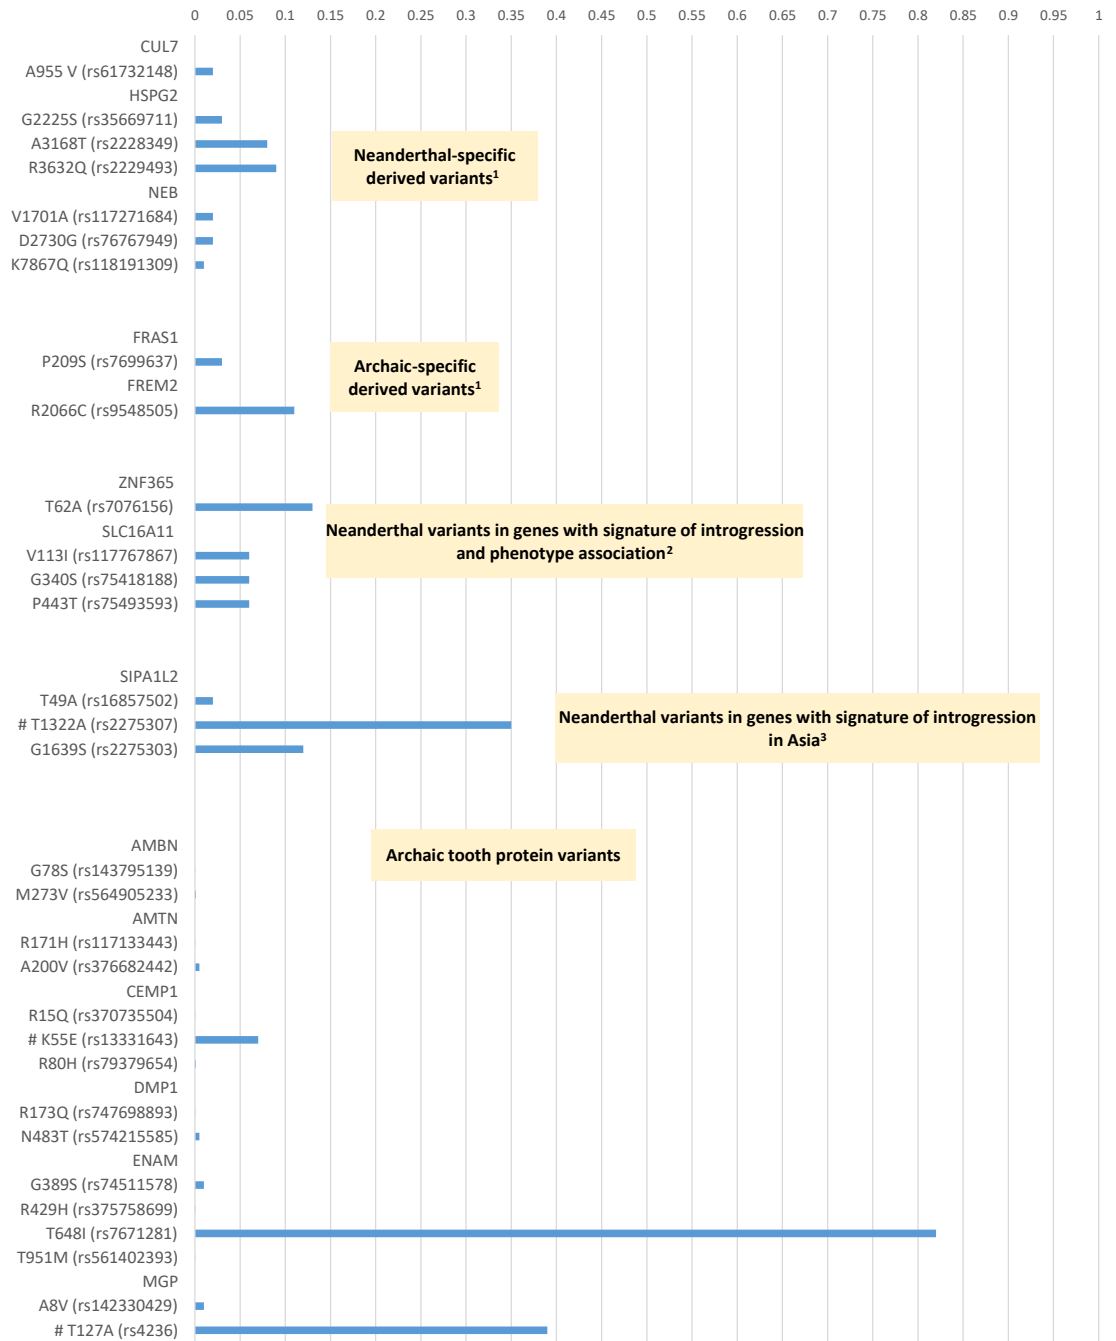

Supplement: pone.0183802.s003.pdf [file pone.0183802.s003.pdf]
